# Supplementary material
Source: PubMed Central journal article supplement (PMC4170118)
Supplement: supp_mol.113.089714_supplemental_089714.pdf [file supp_mol.113.089714_supplemental_089714.pdf]

## Supplemental 1

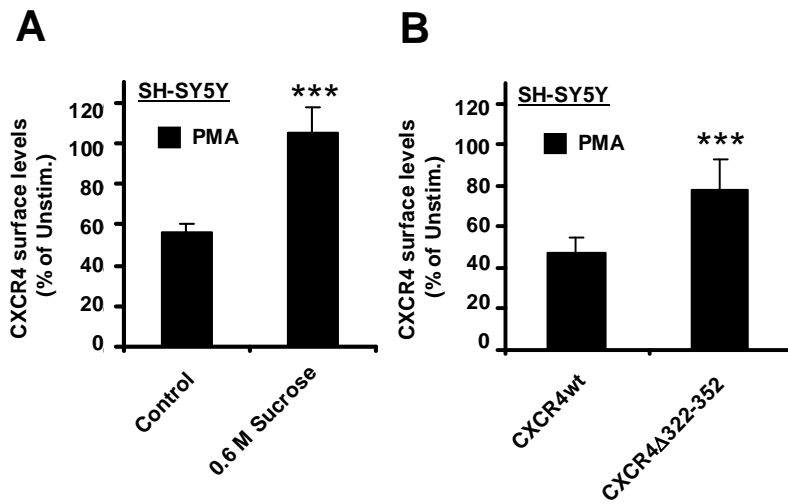

Supplemental Figure 1: **PMA mediated CXCR4 internalization is inhibited in the presence of sucrose and requires the CXCR4 intracellular tail.** SH-SY5Y neuroblastoma cells were treated with either nothing ("Unstim.") or PMA at 37 °C for 60 min. Cell-surface CXCR4 levels were assayed on individual cells via flow cytometry after staining of intact cells with APC-conjugated CXCR4 mAb. A) Surface levels of CXCR4 in PMA treated cells as a percentage of unstimulated ("Unstim.") in control and 0.6 M sucrose conditions. B) Surface levels of CXCR4 in PMA treated cells as a percentage of unstimulated ("Unstim.") in CXCR4wt GFP and CXCR4D322-352 GFP plasmid transfected overexpressions. Each point denotes the mean CXCR4 cell-surface level of PMA - treated as compared to unstimulated cells for three independent experiments  $\pm$  S.E.M.; \*\*\*, significantly different from results using unstimulated cells,  $p < 0.001$ .

## Supplemental 2

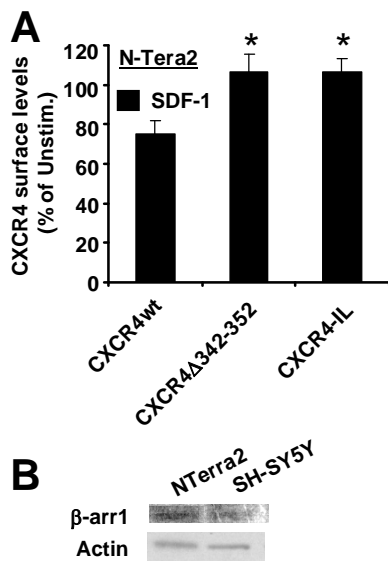

Supplemental Figure 2: **N-Tera2 cells contain  $\beta$ -arrestin1 and SDF-1 dependant CXCR4 internalization is inhibited by mutations to the CXCR4 tail region.** N-tera2 cells were treated with either nothing ("Unstim.") or SDF-1 at 37 °C for 60 min. Cell-surface CXCR4 levels were assayed on individual cells via flow cytometry after staining of intact cells with APC-conjugated CXCR4 mAb. A) Surface levels of CXCR4 in SDF-1 treated cells as a percentage of unstimulated ("Unstim.") in CXCR4wt-YFP, CXCR4 $\Delta$ 342-352, and CXCR4-IL plasmid transfected overexpressions. Each point denotes the mean CXCR4 cell-surface level of PMA - treated as compared to unstimulated cells for three independent experiments  $\pm$  S.E.M.; \*, significantly different from results using unstimulated cells,  $p < 0.05$ . B) Western blot showing the expression of  $\beta$ -arrestin1 in N-Tera2 and SH-SY5Y cells compared to Actin control.

# Supplemental 3

**A**

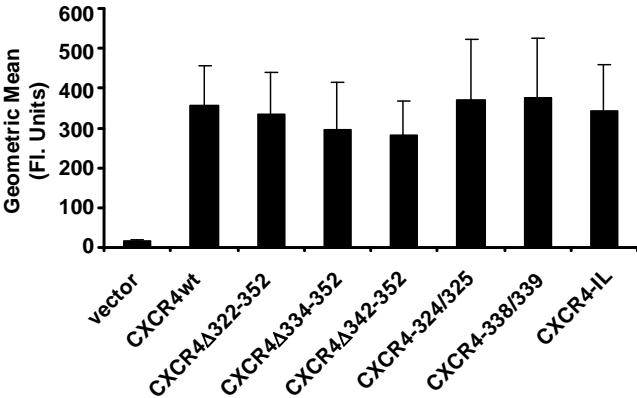

**B**

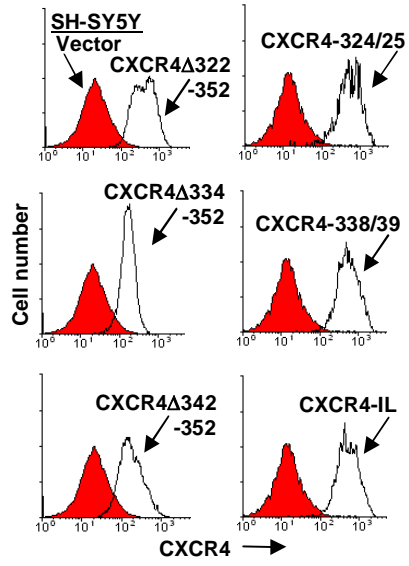

Supplemental Figure 3: **CXCR4 surface levels in CXCR4wt and mutant plasmid overexpression vectors.** Shown as the geometric mean of fluorescent units. A) Surface levels of CXCR4 in Vector transfected cells compared to CXCR4 plasmid overexpression mutants represented in mean geometric units;  $n > 3$ . B) Representative FACS plots comparing vector transfected cells to individual mutant overexpressions as in A.

# Supplemental 4

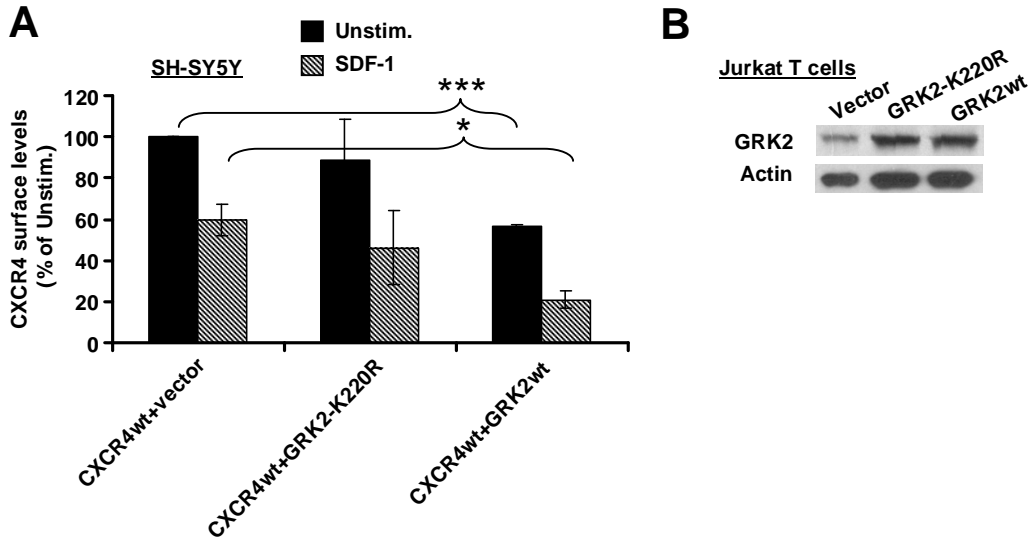

Supplemental Figure 4: **GRK2 requires K220-mediated kinase activity to participate in regulating CXCR4 cell-surface levels and internalization.** A) SH-SY5Y cells were transiently-transfected with either CXCR4wt alone or CXCR4wt plus GRK2 or point-mutated, kinase-inactive GRK2 (GRK2-K220R) expression plasmids, as indicated. The GRK2 expression plasmid, but not GRK2-K220R, significantly reduced CXCR4 cell-surface levels, and also enhanced SDF-1 - dependent CXCR4 internalization. Bars denote the mean CXCR4 cell-surface levels compared to unstimulated without GRK2 addition for 3 independent experiments  $\pm$  S.E.M.; \*\*\*,  $p < 0.001$ ; \*,  $p < 0.05$ . B) Positive control western blot of whole cell lysates of Jurkat T cells showing that transfection with GRK2 or GRK2-K220R expression plasmids induce similar levels of GRK2 overexpression in comparison to actin control.
